# Supplementary material for: Distributed Neural Activity Patterns during Human-to-Human Competition
Source: PubMed Central journal article supplement (PMC5703701; doi:10.3389/fnhum.2017.00571), 2017-11-23
Supplement: Data_Sheet_1.pdf [file Data_Sheet_1.pdf]

# Supplemental Information

## Distributed neural activity patterns during human-to-human competition

Matthew Piva<sup>1</sup>, Xian Zhang<sup>2</sup>, Adam Noah<sup>2</sup>, Steve W. C. Chang<sup>1,3,4</sup>, Joy Hirsch<sup>1,2,4,5,6</sup>

### Affiliations

1 Interdepartmental Neuroscience Program, Yale University School of Medicine, New Haven, CT 06510

2 Department of Psychiatry, Yale University School of Medicine, New Haven, CT 06510

3 Department of Psychology, Yale University, New Haven, CT 06520

4 Department of Neuroscience, Yale University School of Medicine, New Haven, CT 06510

5 Department of Comparative Medicine, Yale University School of Medicine, New Haven, CT 06510

6 Department of Medical Physics and Biochemistry, University College London, UK

### Included are:

Supplemental Figure and Legend

Supplemental Table and Legend

Supplemental References

## Supplemental Figure and Legend

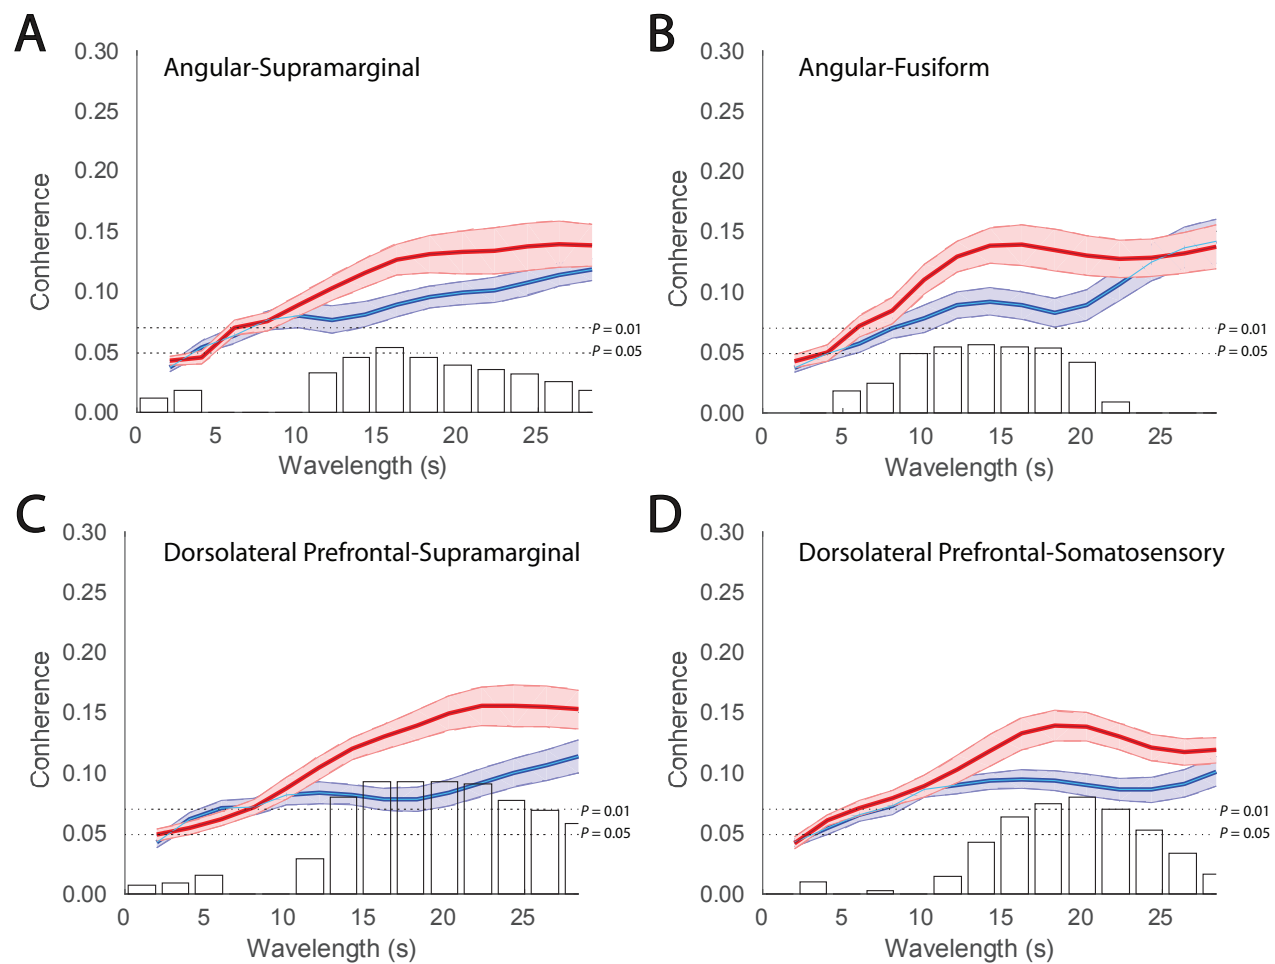

**Figure S1.** Across-brain coherence varies as a function of condition between distinct neural structures even when only subjects who were complete strangers are included in the analysis. Signal coherence between subjects (y-axis) is plotted against the wavelength (x-axis) for the human-human (red) and the human-computer (blue) conditions (shaded areas:  $\pm 1$  SEM). Bar graphs indicate the calculated  $t$ -values for the contrast between the two conditions for each of the wavelength values. The upper horizontal dashed line indicates  $P = 0.01$  and the lower line indicates  $P = 0.05$ , as determined via permutation test. Across-brain coherence is shown between **(A)** angular gyrus and supramarginal gyrus (Partners:  $t(19) = 2.24$ ,  $P = 4E-02$ ), **(B)** angular gyrus and fusiform gyrus (Partners:  $t(19) = 2.33$ ,  $P = 3E-02$ ), **(C)** dorsolateral prefrontal cortex (BA46) and supramarginal gyrus (Partners:  $t(25) = 4.60$ ,  $P = 1E-04$ ), and **(D)** dorsolateral prefrontal cortex (BA46) and somatosensory cortex (Partners:  $t(30) = 3.12$ ,  $P = 4E-03$ ). Degrees of freedom vary because the number of usable channels differed with some subjects due to anatomical variability related to head size and bad channels.

## Supplemental Table and Legend

**Table S1. Channels, group-averaged coordinates, anatomical regions, and atlas-based probabilities\***

| Channel number | MNI Coordinates |        |       | Anatomical Region                            | BA | Probability |
|----------------|-----------------|--------|-------|----------------------------------------------|----|-------------|
|                | X               | Y      | Z     |                                              |    |             |
| 1              | 56.83           | -20.39 | 48.61 | Primary Somatosensory Cortex                 | 1  | 0.38        |
|                |                 |        |       | Primary Somatosensory Cortex                 | 3  | 0.38        |
|                |                 |        |       | Primary Motor Cortex                         | 4  | 0.24        |
| 2              | 61.63           | -33.70 | 37.97 | Primary Somatosensory Cortex                 | 2  | 0.18        |
|                |                 |        |       | Supramarginal Gyrus, part of Wernicke's Area | 40 | 0.82        |
| 3              | 59.36           | -7.23  | 37.74 | Primary Somatosensory Cortex                 | 1  | 0.06        |
|                |                 |        |       | Primary Somatosensory Cortex                 | 3  | 0.19        |
|                |                 |        |       | Primary Motor Cortex                         | 4  | 0.28        |
|                |                 |        |       | Pre- and Supplementary Motor Cortex          | 6  | 0.14        |
|                |                 |        |       | Subcentral Area                              | 43 | 0.33        |
| 4              | 20.35           | 47.41  | 47.40 | Dorsolateral Prefrontal Cortex               | 9  | 1.00        |
| 5              | 50.56           | -73.06 | 13.86 | V3                                           | 19 | 0.46        |
|                |                 |        |       | Fusiform Gyrus                               | 37 | 0.20        |
|                |                 |        |       | Angular Gyrus, part of Wernicke's Area       | 39 | 0.34        |
| 6              | 61.88           | -47.51 | 17.48 | Middle Temporal Gyrus                        | 21 | 0.25        |
|                |                 |        |       | Superior Temporal Gyrus                      | 22 | 0.75        |
|                |                 |        |       | Fusiform Gyrus                               | 37 | 0.01        |
| 7              | 63.26           | -21.52 | 26.13 | Primary Somatosensory Cortex                 | 2  | 0.82        |
|                |                 |        |       | Superior Temporal Gyrus                      | 22 | 0.10        |
|                |                 |        |       | Subcentral Area                              | 43 | 0.07        |
|                |                 |        |       | Retrosubicular Area                          | 48 | 0.01        |
| 8              | 60.41           | 2.82   | 23.29 | Primary Motor Cortex                         | 4  | 0.01        |
|                |                 |        |       | Pre- and Supplementary Motor Cortex          | 6  | 0.59        |
|                |                 |        |       | Subcentral Area                              | 43 | 0.41        |
| 9              | 53.37           | 27.75  | 20.58 | Pars Opercularis, part of Broca's Area       | 44 | 0.02        |
|                |                 |        |       | Pars Triangularis, part of Broca's Area      | 45 | 0.98        |
| 10             | 36.29           | 48.59  | 32.06 | Dorsolateral Prefrontal Cortex               | 9  | 0.18        |
|                |                 |        |       | Pars Triangularis, part of Broca's Area      | 45 | 0.04        |
|                |                 |        |       | Dorsolateral Prefrontal Cortex               | 46 | 0.78        |

|    |        |        |       |                                         |    |      |
|----|--------|--------|-------|-----------------------------------------|----|------|
| 11 | 57.83  | -59.56 | -2.98 | Fusiform Gyrus                          | 37 | 1.00 |
| 12 | 64.93  | -35.49 | 9.08  | Superior Temporal Gyrus                 | 22 | 1.00 |
| 13 | 63.38  | -9.54  | 12.93 | Superior Temporal Gyrus                 | 22 | 0.62 |
|    |        |        |       | Subcentral Area                         | 43 | 0.28 |
|    |        |        |       | Retrosubicular Area                     | 48 | 0.11 |
| 14 | 56.74  | 13.53  | 5.83  | Pre- and Supplementary Motor Cortex     | 6  | 0.17 |
|    |        |        |       | Temporopolar Area                       | 38 | 0.15 |
|    |        |        |       | Pars Opercularis, part of Broca's Area  | 44 | 0.14 |
|    |        |        |       | Pars Triangularis, part of Broca's Area | 45 | 0.01 |
|    |        |        |       | Retrosubicular Area                     | 48 | 0.54 |
| 15 | 45.40  | 46.57  | 17.01 | Pars Triangularis, part of Broca's Area | 45 | 0.44 |
|    |        |        |       | Dorsolateral Prefrontal Cortex          | 46 | 0.56 |
| 16 | 22.68  | 61.13  | 29.80 | Dorsolateral Prefrontal Cortex          | 9  | 0.26 |
|    |        |        |       | Frontopolar Area                        | 10 | 0.47 |
|    |        |        |       | Dorsolateral Prefrontal Cortex          | 46 | 0.26 |
| 17 | 61.83  | -47.40 | -9.79 | Inferior Temporal Gyrus                 | 20 | 0.36 |
|    |        |        |       | Fusiform Gyrus                          | 37 | 0.64 |
| 18 | 65.65  | -23.10 | -4.17 | Middle Temporal Gyrus                   | 21 | 0.94 |
|    |        |        |       | Superior Temporal Gyrus                 | 22 | 0.06 |
| 19 | 61.23  | -2.33  | -7.83 | Middle Temporal Gyrus                   | 21 | 0.89 |
|    |        |        |       | Temporopolar Area                       | 38 | 0.02 |
|    |        |        |       | Retrosubicular Area                     | 48 | 0.09 |
| 20 | 51.22  | 37.68  | 1.78  | Pars Triangularis, part of Broca's area | 45 | 0.82 |
|    |        |        |       | Dorsolateral Prefrontal Cortex          | 46 | 0.18 |
| 21 | 34.28  | 61.15  | 15.32 | Frontopolar Area                        | 10 | 0.69 |
|    |        |        |       | Dorsolateral Prefrontal Cortex          | 46 | 0.31 |
| 22 | -53.95 | -18.88 | 47.90 | Primary Somatosensory Cortex            | 1  | 0.09 |
|    |        |        |       | Primary Somatosensory Cortex            | 3  | 0.60 |
|    |        |        |       | Primary Motor Cortex                    | 4  | 0.30 |
|    |        |        |       | Pre- and Supplementary Motor Cortex     | 6  | 0.01 |

|    |        |        |       |                                              |    |      |
|----|--------|--------|-------|----------------------------------------------|----|------|
| 23 | -16.15 | 48.24  | 46.76 | Dorsolateral Prefrontal Cortex               | 9  | 1.00 |
| 24 | -56.34 | -7.24  | 37.61 | Primary Somatosensory Cortex                 | 1  | 0.02 |
|    |        |        |       | Primary Somatosensory Cortex                 | 3  | 0.17 |
|    |        |        |       | Primary Motor Cortex                         | 4  | 0.37 |
|    |        |        |       | Pre- and Supplementary Motor Cortex          | 6  | 0.14 |
|    |        |        |       | Subcentral Area                              | 43 | 0.30 |
| 25 | -59.27 | -32.34 | 36.98 | Primary Somatosensory Cortex                 | 2  | 0.46 |
|    |        |        |       | Supramarginal Gyrus, part of Wernicke's Area | 40 | 0.54 |
| 26 | -32.93 | 49.10  | 31.93 | Dorsolateral Prefrontal Cortex               | 9  | 0.15 |
|    |        |        |       | Pars Triangularis, part of Broca's Area      | 45 | 0.01 |
|    |        |        |       | Dorsolateral Prefrontal Cortex               | 46 | 0.84 |
| 27 | -50.21 | 27.57  | 20.96 | Pars Opercularis, part of Broca's Area       | 44 | 0.01 |
|    |        |        |       | Pars Triangularis, part of Broca's Area      | 45 | 0.99 |
| 28 | -57.56 | 2.43   | 23.44 | Pre- and Supplementary Motor Cortex          | 6  | 0.57 |
|    |        |        |       | Subcentral Area                              | 43 | 0.43 |
| 29 | -60.69 | -20.44 | 26.54 | Primary Somatosensory Cortex                 | 2  | 0.70 |
|    |        |        |       | Superior Temporal Gyrus                      | 22 | 0.05 |
|    |        |        |       | Subcentral Area                              | 43 | 0.10 |
|    |        |        |       | Retrosubicular Area                          | 48 | 0.14 |
| 30 | -60.48 | -45.93 | 19.27 | Middle Temporal gyrus                        | 21 | 0.03 |
|    |        |        |       | Superior Temporal Gyrus                      | 22 | 0.97 |
| 31 | -51.10 | -70.19 | 17.35 | V3                                           | 19 | 0.30 |
|    |        |        |       | Fusiform Gyrus                               | 37 | 0.13 |
|    |        |        |       | Angular Gyrus, part of Wernicke's Area       | 39 | 0.57 |
| 32 | -17.33 | 62.01  | 30.03 | Dorsolateral Prefrontal Cortex               | 9  | 0.28 |
|    |        |        |       | Frontopolar Area                             | 10 | 0.56 |
|    |        |        |       | Dorsolateral Prefrontal Cortex               | 46 | 0.16 |
| 33 | -41.83 | 47.52  | 17.33 | Pars Triangularis, part of Broca's Area      | 45 | 0.38 |
|    |        |        |       | Dorsolateral Prefrontal Cortex               | 46 | 0.62 |

|    |        |        |       |                                         |    |      |
|----|--------|--------|-------|-----------------------------------------|----|------|
| 34 | -54.34 | 13.25  | 6.56  | Pre- and Supplementary Motor Cortex     | 6  | 0.20 |
|    |        |        |       | Temporopolar Area                       | 38 | 0.06 |
|    |        |        |       | Pars Opercularis, part of Broca's Area  | 44 | 0.15 |
|    |        |        |       | Pars Triangularis, part of Broca's Area | 45 | 0.01 |
|    |        |        |       | Retrosubicular Area                     | 48 | 0.58 |
| 35 | -60.77 | -9.69  | 14.68 | Superior Temporal Gyrus                 | 22 | 0.54 |
|    |        |        |       | Subcentral Area                         | 43 | 0.35 |
|    |        |        |       | Retrosubicular Area                     | 48 | 0.11 |
| 36 | -62.47 | -34.81 | 9.89  | Superior Temporal Gyrus                 | 22 | 0.99 |
|    |        |        |       | Primary and Auditory Association Cortex | 42 | 0.01 |
| 37 | -57.43 | -57.78 | 0.33  | Fusiform Gyrus                          | 37 | 1.00 |
| 38 | -28.93 | 62.53  | 15.44 | Frontopolar Area                        | 10 | 0.75 |
|    |        |        |       | Dorsolateral Prefrontal Cortex          | 46 | 0.25 |
| 39 | -48.28 | 38.47  | 2.13  | Pars Triangularis, part of Broca's Area | 45 | 0.79 |
|    |        |        |       | Dorsolateral Prefrontal Cortex          | 46 | 0.21 |
| 40 | -59.13 | -2.55  | -6.89 | Middle Temporal Gyrus                   | 21 | 0.74 |
|    |        |        |       | Temporopolar Area                       | 38 | 0.07 |
|    |        |        |       | Retrosubicular Area                     | 48 | 0.19 |
| 41 | -63.04 | -23.25 | -3.67 | Middle Temporal Gyrus                   | 21 | 0.94 |
|    |        |        |       | Superior Temporal Gyrus                 | 22 | 0.06 |
| 42 | -60.25 | -46.80 | -8.37 | Inferior Temporal Gyrus                 | 20 | 0.36 |
|    |        |        |       | Middle Temporal Gyrus                   | 21 | 0.04 |
|    |        |        |       | Fusiform Gyrus                          | 37 | 0.60 |

---

\*Atlas references: Mazziotta et al. (2001), Rorden and Brett (2000)  
BA: Brodmann's Area

**Table S1.** Channels, group-averaged coordinates, anatomical regions, and atlas-based probabilities. Channel numbers corresponding to clusters (as shown in Figure S1) are listed in the left column. Anatomical locations of the channels are determined for each subject by digitization based on standard 10-20 fiducial markers. Group averaged centroids are based on the Montreal Neurological Institute (MNI) coordinate system (Mazziotta et al., 2001) and listed as x,y,z coordinates where (-) values indicate left hemisphere. Anatomical region labels are indicated as presented by the SPM-fNIRS utility (Ye et al., 2009) based on representation (Rorden and Brett, 2000) of the Damasio stereotaxic atlas (Damasio and Damasio, 1989). Anatomical regions, including Brodmann's Areas (BA) with probabilities of inclusion in the cluster, are shown in the center and right columns.



## Supplemental References

- Damasio, H., and Damasio, A.R. (1989). *Lesion analysis in neuropsychology*. New York: Oxford University Press.
- Mazziotta, J., Toga, A., Evans, A., Fox, P., Lancaster, J., Zilles, K., Woods, R., Paus, T., Simpson, G., Pike, B., Holmes, C., Collins, L., Thompson, P., Macdonald, D., Iacoboni, M., Schormann, T., Amunts, K., Palomero-Gallagher, N., Geyer, S., Parsons, L., Narr, K., Kabani, N., Le Goualher, G., Boomsma, D., Cannon, T., Kawashima, R., and Mazoyer, B. (2001). A probabilistic atlas and reference system for the human brain: International Consortium for Brain Mapping (ICBM). *Philos Trans R Soc Lond B Biol Sci* 356, 1293-1322.
- Rorden, C., and Brett, M. (2000). Stereotaxic display of brain lesions. *Behav Neurol* 12, 191-200.
- Ye, J.C., Tak, S., Jang, K.E., Jung, J., and Jang, J. (2009). NIRS-SPM: statistical parametric mapping for near-infrared spectroscopy. *Neuroimage* 44, 428-447.
